# Supplementary material for: From Crypto Trust to Digital Governance: Mapping Coordination Frictions in Global Policy Discourse
Source: Research Square preprint supplement (doi:10.21203/rs.3.rs-8702396/v1), 2026-02-20
Supplement: Supplementary file 1 [file 66941f93f9ecb8a2260483b3.docx]

# Supplementary

**Supplementary Table S1. Risk regression: region vs archetype vs source type**

| Term | Coef | SE | p | CI95_L | CI95_U |
| --- | --- | --- | --- | --- | --- |
| Region: EU/UK | -0.065 | 0.911 | 0.944 | -1.850 | 1.721 |
| Region: Global South/Other | -1.680 | 0.852 | 0.049 | -3.349 | -0.010 |
| Region: IGO | 0.546 | 1.083 | 0.614 | -1.577 | 2.669 |
| Region: US/CAN | 2.616 | 1.014 | 0.010 | 0.628 | 4.604 |
| Archetype: Identity_Infrastructure | 0.310 | 1.309 | 0.813 | -2.256 | 2.876 |
| Archetype: Regulatory_Control | 3.048 | 0.641 | 2.004e-06 | 1.791 | 4.304 |
| Archetype: Unclassified | -1.487 | 0.908 | 0.102 | -3.267 | 0.293 |
| Source: igo | 0.546 | 1.083 | 0.614 | -1.577 | 2.669 |
| Source: other | -1.620 | 1.190 | 0.173 | -3.952 | 0.713 |
| Source: think tank | -0.934 | 1.257 | 0.457 | -3.398 | 1.529 |

Supplementary Information1. Archetype shifts and composition (full outputs)

Supplementary Table S2. Archetype shift model (full)

| Archetype | Term | OddsRatio | CI95_L | CI95_U | p_value | Omnibus_chi2 | Omnibus_dof | Omnibus_p |
| --- | --- | --- | --- | --- | --- | --- | --- | --- |
| Coordination_Standards | C(Period)[T.2017-2019] | 653484588.521 | 0.000 | inf | 0.999 | 10.543 | 6 | 0.104 |
| Coordination_Standards | C(Period)[T.2020-2022] | 1565545154.864 | 0.000 | inf | 0.999 | 10.543 | 6 | 0.104 |
| Identity_Infrastructure | C(Period)[T.2017-2019] | 3.189 | 0.118 | 86.169 | 0.490 | 10.543 | 6 | 0.104 |
| Identity_Infrastructure | C(Period)[T.2020-2022] | 0.900 | 0.030 | 26.759 | 0.952 | 10.543 | 6 | 0.104 |
| Regulatory_Control | C(Period)[T.2017-2019] | 1.058 | 0.324 | 3.453 | 0.925 | 10.543 | 6 | 0.104 |
| Regulatory_Control | C(Period)[T.2020-2022] | 1.148 | 0.349 | 3.773 | 0.820 | 10.543 | 6 | 0.104 |
| Unclassified | C(Period)[T.2017-2019] | 0.379 | 0.110 | 1.305 | 0.124 | 10.543 | 6 | 0.104 |
| Unclassified | C(Period)[T.2020-2022] | 0.199 | 0.055 | 0.724 | 0.014 | 10.543 | 6 | 0.104 |

Notes: Odds ratios with 95% confidence intervals.

Supplementary Table S3. Archetype shares by period and region (Stage 2)

| Period | Region | Dominant_Archetype | share |
| --- | --- | --- | --- |
| 2017-2019 | Asia | Coordination_Standards | 0.222 |
| 2017-2019 | Asia | Identity_Infrastructure | 0.556 |
| 2017-2019 | Asia | Regulatory_Control | 0.222 |
| 2017-2019 | Asia | Unclassified | 0.000 |
| 2017-2019 | EU/UK | Coordination_Standards | 0.222 |
| 2017-2019 | EU/UK | Identity_Infrastructure | 0.032 |
| 2017-2019 | EU/UK | Regulatory_Control | 0.571 |
| 2017-2019 | EU/UK | Unclassified | 0.175 |
| 2017-2019 | Global South/Other | Coordination_Standards | 0.235 |
| 2017-2019 | Global South/Other | Identity_Infrastructure | 0.059 |
| 2017-2019 | Global South/Other | Regulatory_Control | 0.471 |
| 2017-2019 | Global South/Other | Unclassified | 0.235 |
| 2017-2019 | IGO | Coordination_Standards | nan |
| 2017-2019 | IGO | Identity_Infrastructure | nan |
| 2017-2019 | IGO | Regulatory_Control | nan |
| 2017-2019 | IGO | Unclassified | nan |
| 2017-2019 | US/CAN | Coordination_Standards | 0.015 |
| 2017-2019 | US/CAN | Identity_Infrastructure | 0.054 |
| 2017-2019 | US/CAN | Regulatory_Control | 0.715 |
| 2017-2019 | US/CAN | Unclassified | 0.215 |
| 2020-2022 | Asia | Coordination_Standards | 0.714 |
| 2020-2022 | Asia | Identity_Infrastructure | 0.000 |
| 2020-2022 | Asia | Regulatory_Control | 0.286 |
| 2020-2022 | Asia | Unclassified | 0.000 |
| 2020-2022 | EU/UK | Coordination_Standards | 0.213 |
| 2020-2022 | EU/UK | Identity_Infrastructure | 0.043 |
| 2020-2022 | EU/UK | Regulatory_Control | 0.574 |
| 2020-2022 | EU/UK | Unclassified | 0.170 |
| 2020-2022 | Global South/Other | Coordination_Standards | 0.160 |
| 2020-2022 | Global South/Other | Identity_Infrastructure | 0.040 |
| 2020-2022 | Global South/Other | Regulatory_Control | 0.400 |
| 2020-2022 | Global South/Other | Unclassified | 0.400 |
| 2020-2022 | IGO | Coordination_Standards | 0.167 |
| 2020-2022 | IGO | Identity_Infrastructure | 0.000 |
| 2020-2022 | IGO | Regulatory_Control | 0.833 |
| 2020-2022 | IGO | Unclassified | 0.000 |
| 2020-2022 | US/CAN | Coordination_Standards | 0.111 |
| 2020-2022 | US/CAN | Identity_Infrastructure | 0.278 |
| 2020-2022 | US/CAN | Regulatory_Control | 0.444 |
| 2020-2022 | US/CAN | Unclassified | 0.167 |

Notes: Shares are within-period proportions of the dominant archetype.

Supplementary Information2. Semantic similarity uncertainty and contrasts

Supplementary Table S4. Bootstrap confidence intervals for regional semantic similarity

| Period | Region1 | Region2 | Similarity | CI95_L | CI95_U | N1 | N2 |
| --- | --- | --- | --- | --- | --- | --- | --- |
| 2017-2019 | Asia | EU/UK | 0.832 | 0.482 | 0.883 | 10 | 75 |
| 2017-2019 | Asia | Global South/Other | 0.662 | 0.466 | 0.789 | 10 | 38 |
| 2017-2019 | Asia | US/CAN | 0.656 | 0.459 | 0.728 | 10 | 133 |
| 2017-2019 | EU/UK | Global South/Other | 0.827 | 0.570 | 0.879 | 75 | 38 |
| 2017-2019 | EU/UK | US/CAN | 0.596 | 0.401 | 0.638 | 75 | 133 |
| 2017-2019 | Global South/Other | US/CAN | 0.612 | 0.415 | 0.722 | 38 | 133 |
| 2020-2022 | Asia | EU/UK | 0.557 | 0.318 | 0.697 | 9 | 51 |
| 2020-2022 | Asia | Global South/Other | 0.243 | 0.104 | 0.448 | 9 | 26 |
| 2020-2022 | Asia | IGO | 0.466 | 0.296 | 0.577 | 9 | 20 |
| 2020-2022 | Asia | US/CAN | 0.541 | 0.337 | 0.671 | 9 | 18 |
| 2020-2022 | EU/UK | Global South/Other | 0.541 | 0.289 | 0.737 | 51 | 26 |
| 2020-2022 | EU/UK | IGO | 0.572 | 0.383 | 0.646 | 51 | 20 |
| 2020-2022 | EU/UK | US/CAN | 0.660 | 0.429 | 0.710 | 51 | 18 |
| 2020-2022 | Global South/Other | IGO | 0.240 | 0.096 | 0.469 | 26 | 20 |
| 2020-2022 | Global South/Other | US/CAN | 0.264 | 0.099 | 0.462 | 26 | 18 |
| 2020-2022 | IGO | US/CAN | 0.685 | 0.521 | 0.796 | 20 | 18 |

Notes: Bootstrap resampling within region–period cells. Similarity is cosine similarity between region centroids.

Supplementary Table S5. Selected contrasts between similarities

| Period | Contrast | Diff | CI95_L | CI95_U |
| --- | --- | --- | --- | --- |
| 2017-2019 | (EU/UK-US/CAN) - (EU/UK-Asia) | -0.236 | -0.379 | 0.087 |
| 2020-2022 | (EU/UK-US/CAN) - (EU/UK-Asia) | 0.103 | -0.064 | 0.281 |

Notes: Contrasts are differences between two similarity entries (e.g., EU–Asia vs EU–US/CAN).

Supplementary Information3. Risk framing index and regression outputs

Supplementary Table S6. Risk index by region and archetype (full)

| Region | Dominant_Archetype | RiskIndex_per1k_mean | N |
| --- | --- | --- | --- |
| Asia | Coordination_Standards | 4.499 | 8 |
| Asia | Identity_Infrastructure | 2.997 | 6 |
| Asia | Regulatory_Control | 5.314 | 6 |
| EU/UK | Coordination_Standards | 2.812 | 24 |
| EU/UK | Identity_Infrastructure | 9.430 | 4 |
| EU/UK | Regulatory_Control | 5.775 | 85 |
| EU/UK | Unclassified | 2.637 | 26 |
| Global South/Other | Coordination_Standards | 2.415 | 13 |
| Global South/Other | Identity_Infrastructure | 4.036 | 3 |
| Global South/Other | Regulatory_Control | 2.795 | 30 |
| Global South/Other | Unclassified | 2.393 | 18 |
| IGO | Coordination_Standards | 1.766 | 3 |
| IGO | Regulatory_Control | 7.941 | 17 |
| US/CAN | Coordination_Standards | 5.396 | 4 |
| US/CAN | Identity_Infrastructure | 3.956 | 12 |
| US/CAN | Regulatory_Control | 9.853 | 104 |
| US/CAN | Unclassified | 2.462 | 32 |

Notes: RiskIndex_per1k is a lexicon-based count per 1,000 tokens.

Supplementary Table S7. Risk regression (selected specification)

| Term | Coef | SE | p | CI95_L | CI95_U |
| --- | --- | --- | --- | --- | --- |
| Region: EU/UK | -0.065 | 0.911 | 0.944 | -1.850 | 1.721 |
| Region: Global South/Other | -1.680 | 0.852 | 0.049 | -3.349 | -0.010 |
| Region: IGO | 0.546 | 1.083 | 0.614 | -1.577 | 2.669 |
| Region: US/CAN | 2.616 | 1.014 | 0.010 | 0.628 | 4.604 |
| Archetype: Identity_Infrastructure | 0.310 | 1.309 | 0.813 | -2.256 | 2.876 |
| Archetype: Regulatory_Control | 3.048 | 0.641 | 2.004e-06 | 1.791 | 4.304 |
| Archetype: Unclassified | -1.487 | 0.908 | 0.102 | -3.267 | 0.293 |
| Source: igo | 0.546 | 1.083 | 0.614 | -1.577 | 2.669 |
| Source: other | -1.620 | 1.190 | 0.173 | -3.952 | 0.713 |
| Source: think tank | -0.934 | 1.257 | 0.457 | -3.398 | 1.529 |

Notes: Full regression table with coefficients. FinBERT sentiment is constant (0) in this corpus.

Supplementary Information4. Coordination friction index components

Supplementary Table S8. Coordination friction heatmap (matrix)

| Pair | 2014-2016 | 2017-2019 | 2020-2022 |
| --- | --- | --- | --- |
| Asia vs EU/UK | 2.956 | -2.034 | -0.235 |
| Asia vs Global South/Other |  | -1.006 | 1.727 |
| Asia vs IGO |  |  | 0.113 |
| Asia vs US/CAN | 3.746 | -1.214 | -0.721 |
| EU/UK vs Global South/Other |  | -2.339 | -0.956 |
| EU/UK vs IGO |  |  | -0.891 |
| EU/UK vs US/CAN | 2.858 | -0.943 | -1.239 |
| Global South/Other vs IGO |  |  | 1.114 |
| Global South/Other vs US/CAN |  | -0.959 | 1.044 |
| IGO vs US/CAN |  |  | -1.023 |

Notes: Values are standardized friction scores; higher values indicate higher expected alignment costs.

Supplementary Table S9. Friction decomposition components

| Period | Pair | Region1 | Region2 | SemanticDistance | JS_ArchetypeDivergence | ToneGap | SemanticDistance_z | JS_ArchetypeDivergence_z | ToneGap_z | FrictionIndex | RiskGap | RiskGap_z |
| --- | --- | --- | --- | --- | --- | --- | --- | --- | --- | --- | --- | --- |
| 2014-2016 | Asia vs EU/UK | Asia | EU/UK | 0.530 | 1.000 | 0.000 | 0.261 | 2.696 | 0.000 | 3.945 | 3.611 | 0.989 |
| 2014-2016 | Asia vs US/CAN | Asia | US/CAN | 0.683 | 1.000 | 0.000 | 1.050 | 2.696 | 0.000 | 4.979 | 4.018 | 1.233 |
| 2014-2016 | EU/UK vs US/CAN | EU/UK | US/CAN | 0.860 | 0.502 | 0.000 | 1.971 | 0.887 | 0.000 | 1.925 | 0.407 | -0.933 |
| 2017-2019 | Asia vs EU/UK | Asia | EU/UK | 0.168 | 0.143 | 0.000 | -1.618 | -0.415 | 0.000 | -3.033 | 0.297 | -0.999 |
| 2017-2019 | Asia vs Global South/Other | Asia | Global South/Other | 0.338 | 0.182 | 0.000 | -0.734 | -0.272 | 0.000 | -1.121 | 1.770 | -0.115 |
| 2017-2019 | Asia vs US/CAN | Asia | US/CAN | 0.344 | 0.117 | 0.000 | -0.704 | -0.510 | 0.000 | 0.157 | 4.247 | 1.371 |
| 2017-2019 | EU/UK vs Global South/Other | EU/UK | Global South/Other | 0.173 | 0.050 | 0.000 | -1.588 | -0.751 | 0.000 | -2.632 | 1.473 | -0.294 |
| 2017-2019 | EU/UK vs US/CAN | EU/UK | US/CAN | 0.404 | 0.106 | 0.000 | -0.395 | -0.548 | 0.000 | 0.606 | 4.545 | 1.549 |
| 2017-2019 | Global South/Other vs US/CAN | Global South/Other | US/CAN | 0.388 | 0.124 | 0.000 | -0.477 | -0.482 | 0.000 | 1.474 | 6.018 | 2.433 |
| 2020-2022 | Asia vs EU/UK | Asia | EU/UK | 0.443 | 0.245 | 0.000 | -0.192 | -0.043 | 0.000 | -0.737 | 1.125 | -0.502 |
| 2020-2022 | Asia vs Global South/Other | Asia | Global South/Other | 0.757 | 0.337 | 0.000 | 1.436 | 0.291 | 0.000 | 0.574 | 0.041 | -1.153 |
| 2020-2022 | Asia vs IGO | Asia | IGO | 0.534 | 0.212 | 0.000 | 0.279 | -0.165 | 0.000 | 0.246 | 2.183 | 0.133 |
| 2020-2022 | Asia vs US/CAN | Asia | US/CAN | 0.459 | 0.088 | 0.000 | -0.107 | -0.614 | 0.000 | -1.516 | 0.637 | -0.796 |
| 2020-2022 | EU/UK vs Global South/Other | EU/UK | Global South/Other | 0.459 | 0.024 | 0.000 | -0.110 | -0.846 | 0.000 | -1.483 | 1.084 | -0.527 |
| 2020-2022 | EU/UK vs IGO | EU/UK | IGO | 0.428 | 0.086 | 0.000 | -0.268 | -0.622 | 0.000 | -1.433 | 1.058 | -0.543 |
| 2020-2022 | EU/UK vs US/CAN | EU/UK | US/CAN | 0.340 | 0.116 | 0.000 | -0.727 | -0.512 | 0.000 | -2.123 | 0.489 | -0.884 |
| 2020-2022 | Global South/Other vs IGO | Global South/Other | IGO | 0.760 | 0.165 | 0.000 | 1.450 | -0.336 | 0.000 | 1.222 | 2.142 | 0.108 |
| 2020-2022 | Global South/Other vs US/CAN | Global South/Other | US/CAN | 0.736 | 0.179 | 0.000 | 1.326 | -0.283 | 0.000 | 0.223 | 0.595 | -0.820 |
| 2020-2022 | IGO vs US/CAN | IGO | US/CAN | 0.315 | 0.210 | 0.000 | -0.852 | -0.171 | 0.000 | -1.272 | 1.547 | -0.249 |

Notes: Friction is a composite of semantic distance, archetype divergence, and risk-gap components (standardized within period).
